# Supplementary material for: Signal mining of adverse events of proteasome inhibitors in multiple myeloma based on FAERS
Source: Frontiers journal article supplement (doi:10.3389/fphar.2024.1396378), 2024-09-03
Supplement: Table_1.XLSX [file Table_1.XLSX]

## Sheet: Sheet1
	bortezomib	carfilzomib	ixazomib
Blood and lymphatic system disorders	9.68309	12.8597	7.3562
Cardiac disorders	4.39391	13.0047	1.20978
Congenital, familial and genetic disorders	0.109848	0	0
Endocrine disorders	0.263635	0	0
Eye disorders	0.406437	0.100379	0.540636
Gastrointestinal disorders	7.32136	0.457283	13.6134
General disorders and administration site conditions	12.3963	12.8374	16.5426
Hepatobiliary disorders	0.538255	0.513049	0
Immune system disorders	0.450376	0.245371	0.0664717
Infections and infestations	14.802	17.4214	16.3299
Injury, poisoning and procedural complications	4.51475	0.133839	9.24843
Investigations	5.94277	9.02298	9.20411
Metabolism and nutrition disorders	7.3653	3.45751	4.44474
Musculoskeletal and connective tissue disorders	1.15889	0.724961	1.75042
Neoplasms benign, malignant and unspecified (incl cysts and polyps)	5.1958	4.59514	8.36214
Nervous system disorders	8.68897	2.911	4.18772
Psychiatric disorders	1.12594	0.992639	0.0354516
Renal and urinary disorders	2.8176	4.51706	2.5791
Reproductive system and breast disorders	0.126325	0	0.0132943
Respiratory, thoracic and mediastinal disorders	8.41984	12.3801	0.354516
Skin and subcutaneous tissue disorders	0.867798	0.345751	2.44616
Surgical and medical procedures	0.241665	0.959179	0.997075
Vascular disorders	3.16911	2.52063	0.190552
Product issues	0	0	0.527342
